# Supplementary material
Source: publisher site journal article supplement (https://www.spandidos-publications.com/2895/downloadSupplementary)

Figure S1. Colonic morphology by hematoxylin-eosin staining. Magnification, x40. CP, constipation-prominent; DP, diarrhea-prominent.

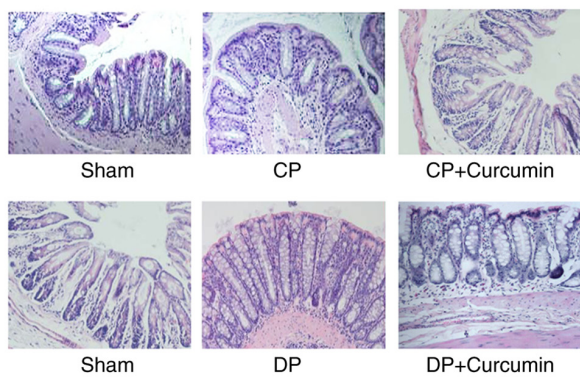

Supplement: Supplementary file 1 [file downloadSupplementary]
